# Supplementary material for: DFT insights into the photocatalytic reduction of CO2 to CO by Re(i) complexes: the crucial role of the triethanolamine “magic” sacrificial electron donor
Source: Royal Society of Chemistry journal article supplement (doi:10.1039/d1dt02188e), 2021-01-01
Supplement: d1dt02188e1.pdf [file d1dt02188e1.pdf]

**ELECTRONIC SUPPLEMENTARY INFORMATION**

**DFT Insights on the Photocatalytic CO<sub>2</sub> to CO reduction by Re(I) complexes: The Crucial Role of Triethanolamine“Magic” Sacrificial Electron Donor**

Athanassios C. Tsipis and Antonia Sarantou

*Laboratory of Inorganic Chemistry, Department of Chemistry, University of Ioannina, Ioannina  
45110, Greece*

## Table of Contents

|                                                                                                                                                                                                                                                                                                                                                |    |
|------------------------------------------------------------------------------------------------------------------------------------------------------------------------------------------------------------------------------------------------------------------------------------------------------------------------------------------------|----|
| <b>Figure S1.</b> Reaction steps for the photocatalytic reduction of CO <sub>2</sub> to CO catalyzed by the [(en)(CO) <sub>3</sub> ReCl] catalyst starting with the [(en)(CO) <sub>3</sub> Re] intermediate resulted upon one electron reduction of the T <sub>1</sub> state by TEOA calculated at the wB97XD/Def2-TZVP level in DMF solution. | S2 |
| <b>Table S1.</b> Cartesian coordinates of reactants, intermediates and products involved in the catalytic cycles.                                                                                                                                                                                                                              | S3 |

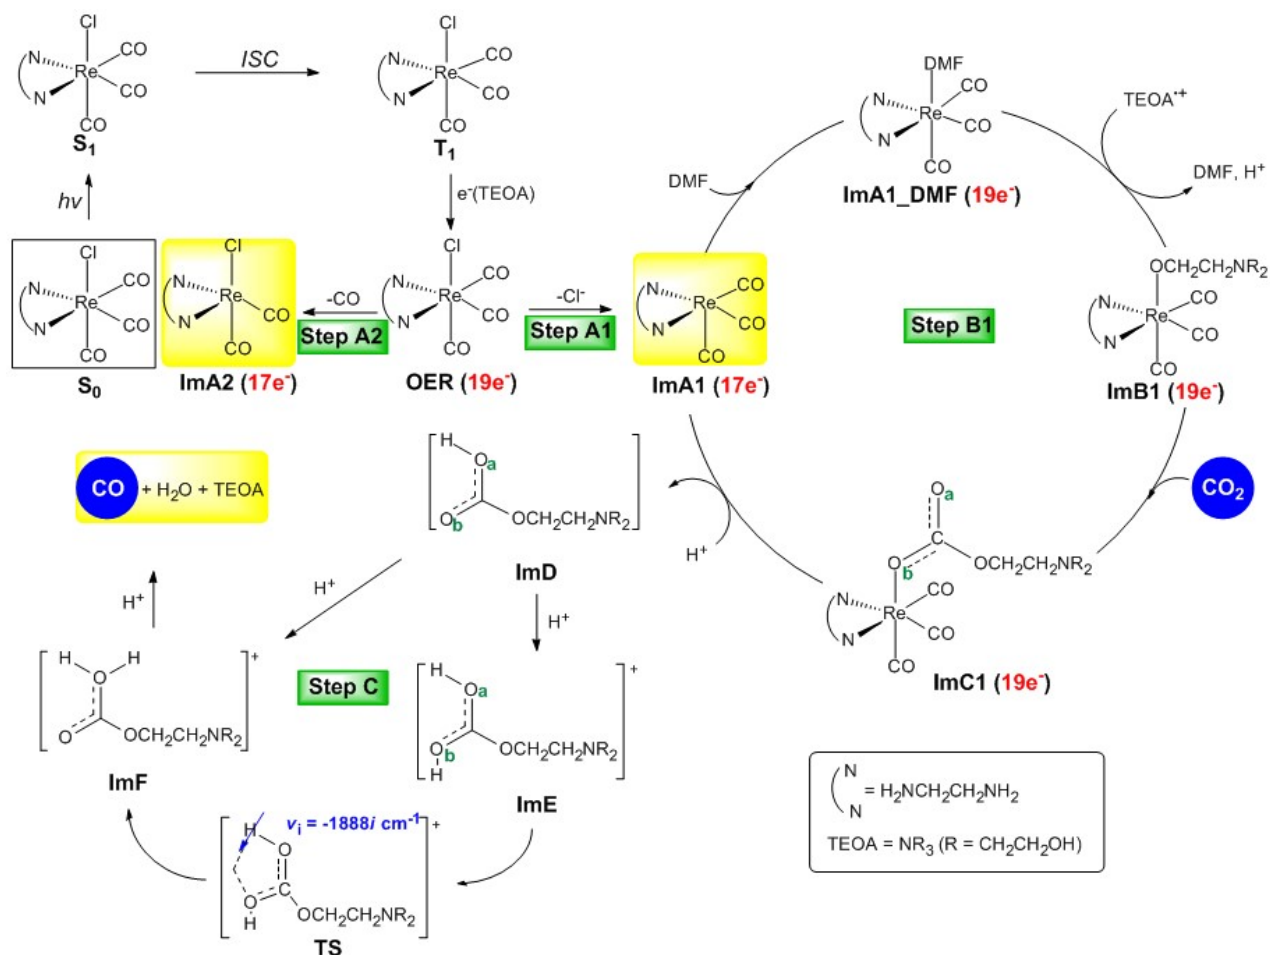

**Fig S1.** Reaction steps for the photocatalytic reduction of  $\text{CO}_2$  to  $\text{CO}$  catalyzed by the  $[(\text{en})(\text{CO})_3\text{ReCl}]$  catalyst starting with the  $[(\text{en})(\text{CO})_3\text{Re}]$  intermediate resulted upon one electron reduction of the  $\text{T}_1$  state by TEOA calculated at the wB97XD/Def2-TZVP level in DMF solution.

**Table S1.** Cartesian coordinates of reactants, intermediates and products involved in the proposed catalytic cycles

**Reaction steps A1 and A2: Photophysics of [(en)(CO)<sub>3</sub>ReCl] Catalyst**

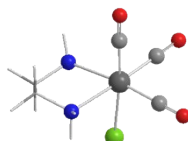

**S<sub>0</sub> (*fac*-[(en)(CO)<sub>3</sub>ReCl]**

|    |              |              |              |
|----|--------------|--------------|--------------|
| Re | 0.208361000  | 0.016315000  | -0.001900000 |
| Cl | -0.609327000 | -2.368473000 | 0.175484000  |
| O  | 2.371441000  | -0.286009000 | 2.146521000  |
| O  | 0.997117000  | 2.956907000  | -0.213332000 |
| N  | -1.559320000 | 0.189021000  | -1.409133000 |
| N  | -1.535350000 | 0.396167000  | 1.374928000  |
| C  | 1.557131000  | -0.180577000 | 1.341016000  |
| C  | 1.538803000  | -0.378171000 | -1.323282000 |
| C  | 0.685594000  | 1.848264000  | -0.133804000 |
| O  | 2.341733000  | -0.600876000 | -2.115769000 |
| C  | -2.839124000 | 0.194467000  | -0.664158000 |
| C  | -2.670473000 | 0.970647000  | 0.622245000  |
| H  | -1.556458000 | -0.590140000 | -2.058223000 |
| H  | -1.487964000 | 1.026907000  | -1.974988000 |
| H  | -1.307365000 | 0.993292000  | 2.160735000  |
| H  | -1.806891000 | -0.503088000 | 1.764104000  |
| H  | -3.089066000 | -0.841521000 | -0.437993000 |
| H  | -3.642818000 | 0.618661000  | -1.265230000 |
| H  | -2.438760000 | 2.015297000  | 0.412298000  |
| H  | -3.590438000 | 0.936731000  | 1.206507000  |

|                                              |              |
|----------------------------------------------|--------------|
| Sum of electronic and zero-point Energies=   | -1069.219211 |
| Sum of electronic and thermal Energies=      | -1069.205542 |
| Sum of electronic and thermal Enthalpies=    | -1069.204598 |
| Sum of electronic and thermal Free Energies= | -1069.260989 |

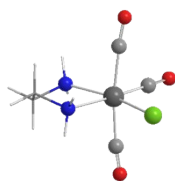

**S<sub>0</sub> (*mer*-[(en)(CO)<sub>3</sub>ReCl]**

|    |              |              |              |
|----|--------------|--------------|--------------|
| Re | -0.151356000 | 0.008487000  | -0.052070000 |
| O  | -0.508319000 | -3.052941000 | -0.570046000 |
| N  | 1.592158000  | 0.170490000  | -1.417576000 |
| N  | 1.632334000  | -0.202266000 | 1.356649000  |
| Cl | -1.529943000 | -0.262435000 | 2.024448000  |
| C  | -1.509480000 | 0.192622000  | -1.346184000 |
| C  | -0.314478000 | -1.948091000 | -0.354077000 |
| O  | -2.329956000 | 0.308729000  | -2.161577000 |
| C  | 2.832574000  | 0.437843000  | -0.654074000 |
| C  | 2.857188000  | -0.448939000 | 0.570441000  |
| O  | -0.448893000 | 3.104740000  | 0.232177000  |
| C  | -0.276095000 | 1.977510000  | 0.156061000  |

|   |             |              |              |
|---|-------------|--------------|--------------|
| H | 1.458815000 | 0.901004000  | -2.105979000 |
| H | 1.711040000 | -0.682182000 | -1.952533000 |
| H | 1.480629000 | -0.952180000 | 2.021440000  |
| H | 1.747098000 | 0.636223000  | 1.915217000  |
| H | 2.820769000 | 1.487306000  | -0.356775000 |
| H | 3.714628000 | 0.267453000  | -1.271343000 |
| H | 2.858656000 | -1.498113000 | 0.271584000  |
| H | 3.756734000 | -0.262117000 | 1.157102000  |

Sum of electronic and zero-point Energies= -1069.180778  
Sum of electronic and thermal Energies= -1069.166696  
Sum of electronic and thermal Enthalpies= -1069.165752  
Sum of electronic and thermal Free Energies= -1069.223736

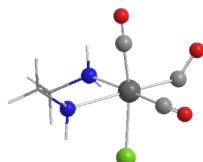

**T<sub>1</sub> (*fac*-[(en)(CO)<sub>3</sub>ReCl])**

|    |              |              |              |
|----|--------------|--------------|--------------|
| Re | -0.211338000 | -0.024177000 | 0.016385000  |
| Cl | 0.649747000  | -2.281372000 | -0.396881000 |
| O  | -2.572118000 | -0.351126000 | -1.900858000 |
| O  | -1.024800000 | 2.942717000  | -0.148593000 |
| N  | 1.532188000  | 0.151574000  | 1.425132000  |
| N  | 1.594505000  | 0.506534000  | -1.357600000 |
| C  | -1.675168000 | -0.236056000 | -1.187148000 |
| C  | -1.457732000 | -0.722395000 | 1.503405000  |
| C  | -0.697295000 | 1.844435000  | -0.057256000 |
| O  | -2.175058000 | -0.194162000 | 2.279805000  |
| C  | 2.825387000  | 0.201577000  | 0.708815000  |
| C  | 2.688537000  | 1.044891000  | -0.534707000 |
| H  | 1.534119000  | -0.644986000 | 2.054933000  |
| H  | 1.436877000  | 0.972135000  | 2.015973000  |
| H  | 1.367226000  | 1.148816000  | -2.108190000 |
| H  | 1.879198000  | -0.366371000 | -1.793513000 |
| H  | 3.084383000  | -0.821998000 | 0.435044000  |
| H  | 3.615324000  | 0.592531000  | 1.352719000  |
| H  | 2.438836000  | 2.075393000  | -0.272605000 |
| H  | 3.635293000  | 1.060157000  | -1.080451000 |

Sum of electronic and zero-point Energies= -1068.492190  
Sum of electronic and thermal Energies= -1068.477418  
Sum of electronic and thermal Enthalpies= -1068.476474  
Sum of electronic and thermal Free Energies= -1068.536637

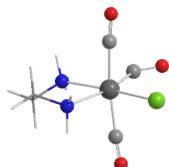

**T<sub>1</sub> (*mer*-[(en)(CO)<sub>3</sub>ReCl])**

|    |              |              |              |
|----|--------------|--------------|--------------|
| Re | 0.138210000  | 0.000956000  | 0.017909000  |
| Cl | 1.821030000  | -0.094887000 | -1.716178000 |
| O  | 0.325935000  | 3.102745000  | -0.215850000 |
| O  | 0.447798000  | -3.094095000 | 0.231159000  |
| N  | -1.606976000 | 0.056326000  | 1.383267000  |
| N  | -1.666472000 | -0.128097000 | -1.387458000 |

|   |              |              |              |
|---|--------------|--------------|--------------|
| C | 0.211132000  | 1.966757000  | -0.129575000 |
| C | 1.238672000  | 0.160996000  | 1.790735000  |
| C | 0.290039000  | -1.963405000 | 0.149816000  |
| O | 2.390014000  | 0.182073000  | 2.058323000  |
| C | -2.853008000 | 0.380675000  | 0.663370000  |
| C | -2.888626000 | -0.417516000 | -0.616873000 |
| H | -1.432247000 | 0.738536000  | 2.115094000  |
| H | -1.713312000 | -0.832703000 | 1.862062000  |
| H | -1.521350000 | -0.842410000 | -2.093023000 |
| H | -1.779084000 | 0.743145000  | -1.895352000 |
| H | -2.843311000 | 1.450102000  | 0.442662000  |
| H | -3.731083000 | 0.168094000  | 1.276492000  |
| H | -2.897938000 | -1.486258000 | -0.392191000 |
| H | -3.790064000 | -0.185539000 | -1.188444000 |

Sum of electronic and zero-point Energies= -1068.481290  
Sum of electronic and thermal Energies= -1068.466484  
Sum of electronic and thermal Enthalpies= -1068.465540  
Sum of electronic and thermal Free Energies= -1068.525919

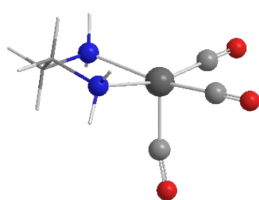

**ImA<sub>1</sub>**

|    |              |              |              |
|----|--------------|--------------|--------------|
| Re | 0.158956000  | 0.011932000  | -0.135398000 |
| O  | 2.299230000  | -2.027320000 | -0.952396000 |
| O  | 0.976139000  | -0.294440000 | 2.784028000  |
| N  | -1.645520000 | 1.413721000  | -0.037053000 |
| N  | -1.638139000 | -1.380275000 | -0.289993000 |
| C  | 1.481820000  | -1.255648000 | -0.653447000 |
| C  | 1.466058000  | 1.375745000  | -0.371148000 |
| C  | 0.544161000  | -0.178943000 | 1.706216000  |
| O  | 2.267334000  | 2.208907000  | -0.497280000 |
| C  | -2.888485000 | 0.699124000  | -0.397270000 |
| C  | -2.852811000 | -0.693133000 | 0.191401000  |
| H  | -1.532283000 | 2.220250000  | -0.639046000 |
| H  | -1.727025000 | 1.781256000  | 0.903918000  |
| H  | -1.492241000 | -2.232007000 | 0.238005000  |
| H  | -1.774840000 | -1.671510000 | -1.252428000 |
| H  | -2.933064000 | 0.638537000  | -1.485592000 |
| H  | -3.771589000 | 1.236757000  | -0.050769000 |
| H  | -2.794851000 | -0.640871000 | 1.279406000  |
| H  | -3.756248000 | -1.241455000 | -0.078663000 |

Sum of electronic and zero-point Energies= -608.895072  
Sum of electronic and thermal Energies= -608.882676  
Sum of electronic and thermal Enthalpies= -608.881731  
Sum of electronic and thermal Free Energies= -608.936450

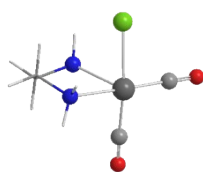

**ImA<sub>2</sub>**

|    |             |              |              |
|----|-------------|--------------|--------------|
| Re | 0.332364000 | -0.030136000 | -0.167910000 |
|----|-------------|--------------|--------------|

|    |              |              |              |
|----|--------------|--------------|--------------|
| Cl | -0.831092000 | -2.325647000 | -0.386872000 |
| O  | 3.000458000  | -0.995445000 | 0.935816000  |
| O  | 1.670709000  | 2.675225000  | -0.494420000 |
| N  | -1.685343000 | 0.663686000  | -1.081291000 |
| N  | -1.096843000 | 0.250316000  | 1.635628000  |
| C  | 1.957207000  | -0.634354000 | 0.506231000  |
| C  | 1.140375000  | 1.620732000  | -0.361164000 |
| C  | -2.770574000 | 0.633181000  | -0.082294000 |
| C  | -2.240691000 | 1.095158000  | 1.258426000  |
| H  | -1.928108000 | 0.066769000  | -1.863116000 |
| H  | -1.585548000 | 1.599926000  | -1.454186000 |
| H  | -0.619759000 | 0.642252000  | 2.435817000  |
| H  | -1.425288000 | -0.670857000 | 1.908852000  |
| H  | -3.110326000 | -0.399804000 | -0.001014000 |
| H  | -3.618965000 | 1.248342000  | -0.386946000 |
| H  | -1.884736000 | 2.124047000  | 1.187345000  |
| H  | -3.037972000 | 1.060964000  | 2.004590000  |

Sum of electronic and zero-point Energies= -955.914303  
Sum of electronic and thermal Energies= -955.902111  
Sum of electronic and thermal Enthalpies= -955.901167  
Sum of electronic and thermal Free Energies= -955.955586

### Reaction step B1

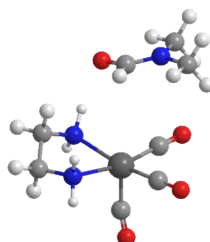

**ImA<sub>1</sub>\_DMF**

|    |              |              |              |
|----|--------------|--------------|--------------|
| Re | 0.748054000  | -0.234865000 | -0.013510000 |
| C  | 2.078341000  | -0.872818000 | 1.169574000  |
| O  | 2.812881000  | -1.447216000 | 1.871414000  |
| C  | -0.631736000 | -1.151068000 | 0.921854000  |
| O  | -1.462932000 | -1.724161000 | 1.498978000  |
| C  | 0.854715000  | -1.744748000 | -1.167477000 |
| O  | 0.923868000  | -2.679283000 | -1.858195000 |
| N  | 0.328422000  | 1.842602000  | 0.834707000  |
| N  | 2.044453000  | 1.151970000  | -1.268947000 |
| C  | 2.225022000  | 2.444904000  | -0.579289000 |
| C  | 0.886133000  | 2.892889000  | -0.039090000 |
| C  | -2.674970000 | 1.164543000  | -0.412059000 |
| O  | -2.569152000 | 2.059565000  | 0.424907000  |
| N  | -3.512138000 | 0.129113000  | -0.341968000 |
| C  | -4.383008000 | -0.063404000 | 0.797194000  |
| C  | -3.489138000 | -0.919778000 | -1.336885000 |
| H  | 0.725136000  | 1.923119000  | 1.763009000  |
| H  | -0.677680000 | 1.995533000  | 0.924472000  |
| H  | 1.614328000  | 1.311638000  | -2.173923000 |
| H  | 2.946976000  | 0.735459000  | -1.462896000 |
| H  | 2.640038000  | 3.199804000  | -1.248464000 |
| H  | 2.927186000  | 2.287688000  | 0.240560000  |
| H  | 0.986947000  | 3.841383000  | 0.489864000  |
| H  | 0.185296000  | 3.040735000  | -0.863212000 |
| H  | -5.416116000 | -0.169840000 | 0.461606000  |

|                                              |              |              |              |
|----------------------------------------------|--------------|--------------|--------------|
| H                                            | -4.302336000 | 0.796100000  | 1.456445000  |
| H                                            | -4.091812000 | -0.964578000 | 1.340378000  |
| H                                            | -4.481561000 | -1.052420000 | -1.771520000 |
| H                                            | -3.173398000 | -1.861074000 | -0.881332000 |
| H                                            | -2.786972000 | -0.663019000 | -2.128144000 |
| H                                            | -2.054757000 | 1.154181000  | -1.319921000 |
| Sum of electronic and zero-point Energies=   |              |              | -857.343294  |
| Sum of electronic and thermal Energies=      |              |              | -857.323375  |
| Sum of electronic and thermal Enthalpies=    |              |              | -857.322431  |
| Sum of electronic and thermal Free Energies= |              |              | -857.394906  |

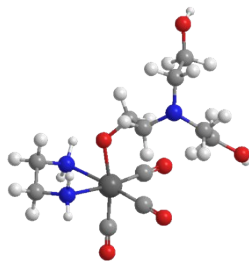

**ImB<sub>1</sub>**

|    |              |              |              |
|----|--------------|--------------|--------------|
| Re | -1.424005000 | 0.133732000  | 0.080212000  |
| N  | -2.420572000 | -1.543479000 | 1.252262000  |
| N  | -2.258725000 | -1.219430000 | -1.512414000 |
| C  | -3.273663000 | -2.135361000 | -0.957504000 |
| C  | -2.763115000 | -2.672500000 | 0.360986000  |
| C  | -2.947124000 | 1.290998000  | 0.174579000  |
| O  | -3.856112000 | 2.003844000  | 0.231390000  |
| C  | -0.691006000 | 1.091398000  | 1.561529000  |
| O  | -0.262300000 | 1.686370000  | 2.452543000  |
| C  | -0.650694000 | 1.442174000  | -1.066648000 |
| O  | -0.220586000 | 2.263245000  | -1.757122000 |
| N  | 3.393452000  | -0.323988000 | -1.142982000 |
| C  | 1.362315000  | -1.200752000 | 0.126451000  |
| C  | 2.038714000  | -0.819545000 | -1.201503000 |
| O  | -0.001281000 | -1.396035000 | -0.028396000 |
| C  | 4.721592000  | -1.165161000 | 0.834024000  |
| C  | 4.431651000  | -1.198070000 | -0.664896000 |
| O  | 5.720108000  | -2.139368000 | 1.092974000  |
| C  | 3.002665000  | 1.793701000  | 0.175872000  |
| C  | 3.587395000  | 1.100362000  | -1.052761000 |
| O  | 3.338036000  | 3.168738000  | 0.085115000  |
| H  | -3.247083000 | -1.226571000 | 1.745600000  |
| H  | -1.766291000 | -1.863054000 | 1.956956000  |
| H  | -1.433532000 | -1.748065000 | -1.787566000 |
| H  | -2.617413000 | -0.756497000 | -2.338064000 |
| H  | -3.485357000 | -2.957851000 | -1.642088000 |
| H  | -4.193988000 | -1.568832000 | -0.810602000 |
| H  | -3.502103000 | -3.329891000 | 0.818819000  |
| H  | -1.848790000 | -3.239451000 | 0.193419000  |
| H  | 1.590823000  | -0.426694000 | 0.875490000  |
| H  | 1.825959000  | -2.128651000 | 0.497222000  |
| H  | 1.999846000  | -1.697428000 | -1.858879000 |
| H  | 1.426610000  | -0.049178000 | -1.677827000 |
| H  | 3.809685000  | -1.377787000 | 1.401975000  |
| H  | 5.075574000  | -0.168507000 | 1.121495000  |
| H  | 5.370358000  | -0.969552000 | -1.184212000 |
| H  | 4.162113000  | -2.223415000 | -0.935350000 |
| H  | 5.960518000  | -2.093584000 | 2.019553000  |
| H  | 3.405225000  | 1.351789000  | 1.094424000  |
| H  | 1.915472000  | 1.664643000  | 0.190694000  |



|   |             |             |              |
|---|-------------|-------------|--------------|
| H | 3.148038000 | 1.584828000 | -1.933761000 |
| H | 4.661732000 | 1.304231000 | -1.082278000 |
| H | 2.888610000 | 3.640051000 | 0.788207000  |

Sum of electronic and zero-point Energies= -1126.264287  
Sum of electronic and thermal Energies= -1126.238910  
Sum of electronic and thermal Enthalpies= -1126.237965  
Sum of electronic and thermal Free Energies= -1126.322045

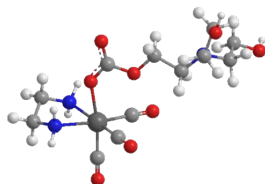

**ImC<sub>1</sub>**

|    |              |              |              |
|----|--------------|--------------|--------------|
| Re | 2.129407000  | 0.232448000  | 0.201639000  |
| N  | 3.345725000  | 0.095916000  | -1.702551000 |
| N  | 3.515200000  | -1.499091000 | 0.582754000  |
| C  | 4.646266000  | -1.480421000 | -0.368702000 |
| C  | 4.111384000  | -1.170551000 | -1.748339000 |
| C  | 3.225998000  | 1.539921000  | 1.036130000  |
| O  | 3.880283000  | 2.340850000  | 1.550675000  |
| C  | 0.958504000  | 1.645166000  | -0.345490000 |
| O  | 0.262242000  | 2.505880000  | -0.658681000 |
| C  | 1.120985000  | 0.131920000  | 1.822364000  |
| O  | 0.512460000  | 0.086706000  | 2.798378000  |
| N  | -4.450867000 | 0.030567000  | 0.031626000  |
| C  | -2.309111000 | -0.937538000 | -0.648769000 |
| C  | -3.006235000 | 0.171164000  | 0.115936000  |
| O  | -0.913030000 | -0.750564000 | -0.463719000 |
| C  | -6.192613000 | -1.648493000 | 0.443553000  |
| C  | -4.985837000 | -0.915955000 | 0.998622000  |
| O  | -6.707721000 | -2.482006000 | 1.467264000  |
| C  | -5.184367000 | 1.935522000  | -1.334098000 |
| C  | -5.144124000 | 1.309536000  | 0.047135000  |
| O  | -5.798821000 | 3.207289000  | -1.218714000 |
| C  | -0.081330000 | -1.653064000 | -1.036339000 |
| O  | 1.154204000  | -1.391657000 | -0.839480000 |
| O  | -0.516613000 | -2.604585000 | -1.666608000 |
| H  | 3.977893000  | 0.883409000  | -1.790675000 |
| H  | 2.727936000  | 0.140953000  | -2.505210000 |
| H  | 2.959962000  | -2.336872000 | 0.430302000  |
| H  | 3.863956000  | -1.549515000 | 1.532211000  |
| H  | 5.175062000  | -2.433987000 | -0.373982000 |
| H  | 5.342547000  | -0.705809000 | -0.045675000 |
| H  | 4.925227000  | -1.113541000 | -2.470724000 |
| H  | 3.424513000  | -1.955169000 | -2.062214000 |
| H  | -2.561521000 | -0.879438000 | -1.709429000 |
| H  | -2.604043000 | -1.923601000 | -0.284014000 |
| H  | -2.655148000 | 0.180057000  | 1.158751000  |
| H  | -2.711928000 | 1.125740000  | -0.322148000 |
| H  | -5.882126000 | -2.236019000 | -0.427373000 |
| H  | -6.950670000 | -0.930252000 | 0.110295000  |
| H  | -5.257657000 | -0.422269000 | 1.943831000  |
| H  | -4.220047000 | -1.655025000 | 1.239574000  |
| H  | -7.460562000 | -2.962615000 | 1.119826000  |
| H  | -5.751307000 | 1.281009000  | -2.005115000 |
| H  | -4.169688000 | 2.031026000  | -1.737429000 |
| H  | -4.683147000 | 2.013949000  | 0.756183000  |

|   |              |             |              |
|---|--------------|-------------|--------------|
| H | -6.171602000 | 1.154997000 | 0.380368000  |
| H | -5.834731000 | 3.609050000 | -2.088040000 |

Sum of electronic and zero-point Energies= -1314.879498  
Sum of electronic and thermal Energies= -1314.851139  
Sum of electronic and thermal Enthalpies= -1314.850194  
Sum of electronic and thermal Free Energies= -1314.944089

### Reaction step C

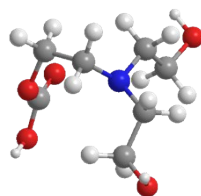

**ImD**

|   |              |              |              |
|---|--------------|--------------|--------------|
| N | 0.672418000  | 0.197032000  | 0.609081000  |
| C | -1.442328000 | -0.502905000 | 1.674639000  |
| C | 0.068829000  | -0.444756000 | 1.763702000  |
| O | -1.819164000 | -1.281917000 | 0.530913000  |
| C | 0.599317000  | 2.275431000  | -0.713695000 |
| C | 0.629665000  | 1.647918000  | 0.673464000  |
| O | 0.609190000  | 3.691261000  | -0.653896000 |
| C | 1.889558000  | -1.578905000 | -0.574761000 |
| C | 1.990307000  | -0.335088000 | 0.298078000  |
| O | 3.158302000  | -2.141577000 | -0.854712000 |
| C | -2.197880000 | -0.632157000 | -0.564470000 |
| O | -2.462916000 | 0.534502000  | -0.656387000 |
| O | -2.292602000 | -1.463308000 | -1.599432000 |
| H | -1.894284000 | 0.484026000  | 1.595852000  |
| H | -1.854501000 | -1.016740000 | 2.541098000  |
| H | 0.340093000  | 0.053840000  | 2.707181000  |
| H | 0.440612000  | -1.468048000 | 1.830617000  |
| H | -0.278695000 | 1.903419000  | -1.249747000 |
| H | 1.485523000  | 1.993447000  | -1.284221000 |
| H | 1.474535000  | 2.059467000  | 1.247502000  |
| H | -0.282740000 | 1.946526000  | 1.194756000  |
| H | -0.221574000 | 3.983785000  | -0.273231000 |
| H | 1.449863000  | -1.305962000 | -1.534966000 |
| H | 1.228200000  | -2.318376000 | -0.108983000 |
| H | 2.559196000  | -0.567046000 | 1.212619000  |
| H | 2.567515000  | 0.415356000  | -0.242901000 |
| H | 3.526671000  | -2.483881000 | -0.037490000 |
| H | -2.014629000 | -2.347952000 | -1.335271000 |

Sum of electronic and zero-point Energies= -706.489917  
Sum of electronic and thermal Energies= -706.475021  
Sum of electronic and thermal Enthalpies= -706.474077  
Sum of electronic and thermal Free Energies= -706.533973

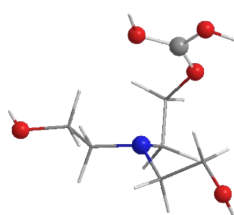

**S10**

### ImE

|   |              |              |              |
|---|--------------|--------------|--------------|
| N | -0.615605000 | 0.267098000  | 0.615805000  |
| C | 1.277420000  | -0.839188000 | 1.725561000  |
| C | 0.196561000  | 0.212206000  | 1.819183000  |
| O | 2.162758000  | -0.455160000 | 0.616203000  |
| C | -2.190400000 | -1.070100000 | -0.756801000 |
| C | -1.703699000 | -0.703852000 | 0.639344000  |
| O | -3.282320000 | -1.964698000 | -0.711098000 |
| C | -0.014325000 | 2.382244000  | -0.492401000 |
| C | -1.061415000 | 1.625207000  | 0.313450000  |
| O | -0.409839000 | 3.707523000  | -0.774295000 |
| C | 2.008170000  | -0.921224000 | -0.547000000 |
| O | 1.287282000  | -1.955046000 | -0.767398000 |
| O | 2.634342000  | -0.389248000 | -1.531796000 |
| H | 0.902418000  | -1.841821000 | 1.539403000  |
| H | 1.926952000  | -0.839035000 | 2.594866000  |
| H | -0.393803000 | 0.000306000  | 2.721299000  |
| H | 0.677831000  | 1.177400000  | 1.978004000  |
| H | -1.358583000 | -1.483953000 | -1.335950000 |
| H | -2.549493000 | -0.187345000 | -1.286255000 |
| H | -2.552859000 | -0.344261000 | 1.238461000  |
| H | -1.342913000 | -1.617219000 | 1.119879000  |
| H | -2.984295000 | -2.799822000 | -0.344530000 |
| H | 0.117065000  | 1.886609000  | -1.455508000 |
| H | 0.953329000  | 2.362924000  | 0.024479000  |
| H | -1.304232000 | 2.179195000  | 1.232159000  |
| H | -1.977786000 | 1.583820000  | -0.273803000 |
| H | -0.434331000 | 4.205414000  | 0.045482000  |
| H | 1.281122000  | -2.206654000 | -1.703538000 |
| H | 3.137153000  | 0.396018000  | -1.266029000 |

Sum of electronic and zero-point Energies= -706.872675  
Sum of electronic and thermal Energies= -706.858013  
Sum of electronic and thermal Enthalpies= -706.857069  
Sum of electronic and thermal Free Energies= -706.914885

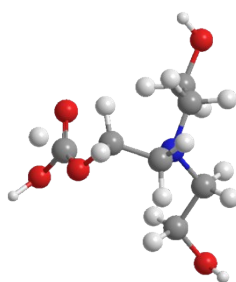

### TS

|   |              |              |              |
|---|--------------|--------------|--------------|
| N | 0.706667000  | -0.100109000 | 0.613245000  |
| C | -1.393917000 | 0.293110000  | 1.824175000  |
| C | -0.032900000 | -0.359868000 | 1.835482000  |
| O | -2.150060000 | -0.286978000 | 0.692929000  |
| C | 1.664974000  | 1.729330000  | -0.754025000 |
| C | 1.405975000  | 1.178587000  | 0.642555000  |
| O | 2.387947000  | 2.944596000  | -0.708232000 |
| C | 0.796445000  | -2.267683000 | -0.553729000 |
| C | 1.565268000  | -1.220362000 | 0.240253000  |
| O | 1.607533000  | -3.372898000 | -0.899339000 |
| C | -2.167287000 | 0.338009000  | -0.389628000 |
| O | -1.838505000 | 1.455622000  | -0.779046000 |
| O | -2.693547000 | -0.274496000 | -1.520856000 |

|   |              |              |              |
|---|--------------|--------------|--------------|
| H | -1.366466000 | 1.371313000  | 1.685127000  |
| H | -1.984822000 | 0.038266000  | 2.697544000  |
| H | 0.491049000  | -0.008297000 | 2.735455000  |
| H | -0.174283000 | -1.434101000 | 1.953524000  |
| H | 0.712335000  | 1.850929000  | -1.277816000 |
| H | 2.276850000  | 1.039272000  | -1.335747000 |
| H | 2.356469000  | 1.107581000  | 1.191549000  |
| H | 0.785908000  | 1.902385000  | 1.177677000  |
| H | 1.828481000  | 3.619405000  | -0.317935000 |
| H | 0.455198000  | -1.824823000 | -1.490501000 |
| H | -0.092006000 | -2.593656000 | -0.000444000 |
| H | 2.025609000  | -1.683551000 | 1.125712000  |
| H | 2.383714000  | -0.856880000 | -0.379953000 |
| H | 1.828411000  | -3.853452000 | -0.098660000 |
| H | -2.450390000 | 0.867745000  | -1.848658000 |
| H | -3.561014000 | -0.714883000 | -1.463719000 |

Sum of electronic and zero-point Energies= -706.806207  
Sum of electronic and thermal Energies= -706.791254  
Sum of electronic and thermal Enthalpies= -706.790309  
Sum of electronic and thermal Free Energies= -706.849348

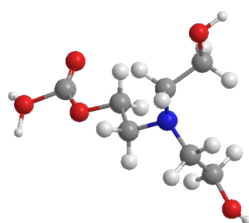

**ImF**

|   |              |              |              |
|---|--------------|--------------|--------------|
| N | -1.179152000 | -0.019394000 | -0.244691000 |
| C | 1.173200000  | 0.015479000  | 0.229274000  |
| C | 0.110935000  | -0.452052000 | -0.741465000 |
| O | 2.480615000  | -0.349208000 | -0.350504000 |
| C | -2.315104000 | 2.045565000  | 0.443712000  |
| C | -1.528803000 | 1.336675000  | -0.643044000 |
| O | -2.658152000 | 3.329094000  | -0.042229000 |
| C | -2.261827000 | -2.055945000 | 0.602398000  |
| C | -2.241504000 | -0.988143000 | -0.475102000 |
| O | -3.251217000 | -3.003519000 | 0.250699000  |
| C | 3.511832000  | 0.064142000  | 0.269806000  |
| O | 4.672547000  | -0.412169000 | -0.552331000 |
| O | 3.758264000  | 0.692081000  | 1.223686000  |
| H | 1.090709000  | -0.485434000 | 1.191197000  |
| H | 1.170665000  | 1.095423000  | 0.365902000  |
| H | 0.326720000  | -0.071142000 | -1.748663000 |
| H | 0.138923000  | -1.540521000 | -0.793902000 |
| H | -1.695314000 | 2.112070000  | 1.345064000  |
| H | -3.213095000 | 1.469965000  | 0.696436000  |
| H | -2.101714000 | 1.348794000  | -1.580822000 |
| H | -0.615845000 | 1.906426000  | -0.826857000 |
| H | -3.172936000 | 3.784111000  | 0.625744000  |
| H | -2.483173000 | -1.584562000 | 1.566195000  |
| H | -1.276953000 | -2.533063000 | 0.682105000  |
| H | -2.152001000 | -1.463144000 | -1.462480000 |
| H | -3.200592000 | -0.469540000 | -0.461593000 |
| H | -3.317304000 | -3.655331000 | 0.949926000  |
| H | 4.530860000  | -1.193434000 | -1.115506000 |
| H | 5.516282000  | -0.429422000 | -0.067957000 |

Sum of electronic and zero-point Energies= -706.831578  
 Sum of electronic and thermal Energies= -706.815558  
 Sum of electronic and thermal Enthalpies= -706.814613  
 Sum of electronic and thermal Free Energies= -706.876913

### Reaction step B1'

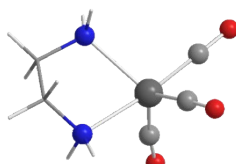

**ImA<sub>1</sub>'**

|    |              |              |              |
|----|--------------|--------------|--------------|
| Re | 0.224533000  | 0.006393000  | 0.028052000  |
| O  | 2.722831000  | -0.212222000 | -1.721922000 |
| O  | 1.139057000  | -2.515907000 | 1.563485000  |
| N  | -1.802806000 | 0.159109000  | 1.146279000  |
| N  | -1.425748000 | -0.236076000 | -1.606263000 |
| C  | 1.764185000  | -0.127052000 | -1.043174000 |
| C  | 0.713357000  | 1.783634000  | 0.525496000  |
| C  | 0.706762000  | -1.602667000 | 0.937090000  |
| O  | 1.141963000  | 2.822359000  | 0.915794000  |
| C  | -2.912740000 | 0.396424000  | 0.208391000  |
| C  | -2.738857000 | -0.499786000 | -0.997278000 |
| H  | -1.774128000 | 0.899253000  | 1.835104000  |
| H  | -1.971972000 | -0.696062000 | 1.661500000  |
| H  | -1.185291000 | -0.983386000 | -2.243321000 |
| H  | -1.472868000 | 0.606916000  | -2.164547000 |
| H  | -2.867227000 | 1.442111000  | -0.101159000 |
| H  | -3.884570000 | 0.220882000  | 0.674472000  |
| H  | -2.755072000 | -1.545286000 | -0.683580000 |
| H  | -3.556024000 | -0.342310000 | -1.704471000 |

Sum of electronic and zero-point Energies= -608.990349  
 Sum of electronic and thermal Energies= -608.977868  
 Sum of electronic and thermal Enthalpies= -608.976924  
 Sum of electronic and thermal Free Energies= -609.031379

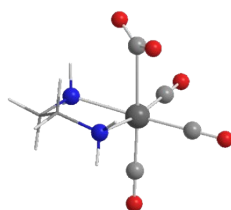

**ImB<sub>1</sub>'**

|    |              |              |              |
|----|--------------|--------------|--------------|
| Re | -0.268650000 | -0.071464000 | -0.005398000 |
| O  | -2.140131000 | 0.881746000  | 2.226946000  |
| O  | -1.923356000 | -2.635948000 | -0.185056000 |
| N  | 1.357613000  | -0.660727000 | -1.456615000 |
| N  | 1.343957000  | -0.904473000 | 1.321414000  |
| C  | -1.438759000 | 0.523937000  | 1.388729000  |
| C  | -1.451845000 | 0.732349000  | -1.282985000 |
| C  | -1.283448000 | -1.680074000 | -0.119227000 |
| O  | -2.163273000 | 1.211705000  | -2.048076000 |

|   |             |              |              |
|---|-------------|--------------|--------------|
| C | 2.625262000 | -0.945123000 | -0.745437000 |
| C | 2.322253000 | -1.687019000 | 0.536547000  |
| C | 1.154526000 | 1.944104000  | 0.145303000  |
| O | 1.259176000 | 2.450758000  | -0.953281000 |
| O | 1.564828000 | 2.088111000  | 1.281692000  |
| H | 1.506683000 | 0.090856000  | -2.121877000 |
| H | 1.083222000 | -1.469268000 | -2.003413000 |
| H | 0.978090000 | -1.472977000 | 2.075573000  |
| H | 1.803039000 | -0.108605000 | 1.759770000  |
| H | 3.101461000 | 0.009885000  | -0.520655000 |
| H | 3.306443000 | -1.521717000 | -1.370330000 |
| H | 1.874225000 | -2.655875000 | 0.314751000  |
| H | 3.238743000 | -1.856128000 | 1.102031000  |

Sum of electronic and zero-point Energies= -797.502319  
Sum of electronic and thermal Energies= -797.486529  
Sum of electronic and thermal Enthalpies= -797.485584  
Sum of electronic and thermal Free Energies= -797.548340

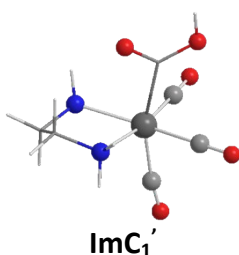

|    |              |              |              |
|----|--------------|--------------|--------------|
| Re | -0.076258000 | -0.174709000 | -0.008232000 |
| O  | -2.135446000 | -0.273238000 | 2.295364000  |
| O  | -0.566507000 | -3.262785000 | -0.087293000 |
| N  | 1.655645000  | 0.058799000  | -1.400146000 |
| N  | 1.656451000  | -0.004008000 | 1.381299000  |
| C  | -1.390985000 | -0.246880000 | 1.436040000  |
| C  | -1.397423000 | -0.156267000 | -1.448814000 |
| C  | -0.297546000 | -2.160053000 | -0.061349000 |
| O  | -2.146297000 | -0.129400000 | -2.304356000 |
| C  | 2.878460000  | 0.471762000  | -0.663813000 |
| C  | 2.926746000  | -0.257596000 | 0.657034000  |
| C  | -0.526799000 | 1.927003000  | 0.072693000  |
| O  | -1.744414000 | 2.446667000  | 0.067692000  |
| O  | 0.482161000  | 2.598246000  | 0.124456000  |
| H  | 1.463631000  | 0.735381000  | -2.131856000 |
| H  | 1.834273000  | -0.814066000 | -1.887714000 |
| H  | 1.597147000  | -0.614657000 | 2.188852000  |
| H  | 1.670875000  | 0.943388000  | 1.751404000  |
| H  | 2.812314000  | 1.545665000  | -0.497062000 |
| H  | 3.770476000  | 0.264535000  | -1.252347000 |
| H  | 3.015431000  | -1.332988000 | 0.503351000  |
| H  | 3.779994000  | 0.074993000  | 1.246471000  |
| H  | -1.680146000 | 3.413682000  | 0.110601000  |

Sum of electronic and zero-point Energies= -797.918245  
Sum of electronic and thermal Energies= -797.902235  
Sum of electronic and thermal Enthalpies= -797.901291  
Sum of electronic and thermal Free Energies= -797.963659

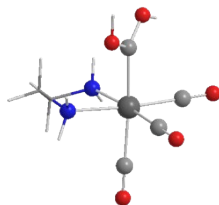

**ImD<sub>1</sub>'**

|    |              |              |              |
|----|--------------|--------------|--------------|
| Re | 0.166841000  | 0.148064000  | 0.037253000  |
| O  | 2.543799000  | -0.225990000 | 2.024185000  |
| O  | 0.389121000  | 3.324657000  | -0.145185000 |
| N  | -1.586870000 | 0.230993000  | -1.314239000 |
| N  | -1.525166000 | 0.250331000  | 1.471935000  |
| C  | 1.674401000  | -0.079302000 | 1.318050000  |
| C  | 1.623047000  | 0.167931000  | -1.318491000 |
| C  | 0.289737000  | 2.209756000  | -0.056619000 |
| O  | 2.460516000  | 0.194339000  | -2.075716000 |
| C  | -2.845521000 | -0.012525000 | -0.558427000 |
| C  | -2.763501000 | 0.691856000  | 0.773716000  |
| C  | -0.049821000 | -1.994390000 | -0.099707000 |
| O  | -0.357749000 | -2.459627000 | -1.262996000 |
| O  | 0.088089000  | -2.924102000 | 0.783830000  |
| H  | -1.504859000 | -0.466644000 | -2.050698000 |
| H  | -1.654968000 | 1.115457000  | -1.809206000 |
| H  | -1.331367000 | 0.888285000  | 2.240005000  |
| H  | -1.704735000 | -0.639979000 | 1.927208000  |
| H  | -2.948432000 | -1.088000000 | -0.417015000 |
| H  | -3.703355000 | 0.336961000  | -1.128855000 |
| H  | -2.707189000 | 1.771125000  | 0.638404000  |
| H  | -3.639665000 | 0.470668000  | 1.380100000  |
| H  | -0.423456000 | -3.430707000 | -1.284517000 |
| H  | 0.328911000  | -2.605440000 | 1.662649000  |

Sum of electronic and zero-point Energies= -798.304534  
 Sum of electronic and thermal Energies= -798.288571  
 Sum of electronic and thermal Enthalpies= -798.287627  
 Sum of electronic and thermal Free Energies= -798.349428

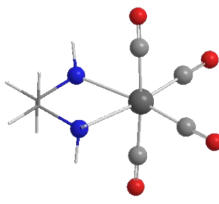

**ImE<sub>1</sub>'**

|    |              |              |              |
|----|--------------|--------------|--------------|
| Re | 0.167825000  | 0.003798000  | 0.005492000  |
| C  | 0.066428000  | 2.036080000  | -0.103437000 |
| O  | 2.286468000  | -0.036076000 | -2.349674000 |
| N  | -1.532656000 | 0.011592000  | 1.404827000  |
| N  | -1.534875000 | -0.140479000 | -1.386954000 |
| C  | 1.542763000  | -0.021799000 | -1.511065000 |
| C  | 1.614976000  | 0.142485000  | 1.445072000  |
| O  | 2.406996000  | 0.207911000  | 2.235870000  |
| C  | -2.796637000 | 0.299939000  | 0.662513000  |
| C  | -2.787223000 | -0.464251000 | -0.638203000 |
| C  | 0.263716000  | -2.027208000 | 0.132696000  |
| O  | 0.342386000  | -3.144775000 | 0.207510000  |
| O  | 0.033216000  | 3.156790000  | -0.162188000 |
| H  | -1.431169000 | 0.703454000  | 2.144262000  |

|   |              |              |              |
|---|--------------|--------------|--------------|
| H | -1.634104000 | -0.874464000 | 1.893611000  |
| H | -1.397116000 | -0.845512000 | -2.107238000 |
| H | -1.672059000 | 0.726385000  | -1.899269000 |
| H | -2.844759000 | 1.373993000  | 0.487854000  |
| H | -3.654595000 | 0.016976000  | 1.268802000  |
| H | -2.800791000 | -1.538641000 | -0.462315000 |
| H | -3.656232000 | -0.207119000 | -1.240328000 |

Sum of electronic and zero-point Energies= -721.864828  
 Sum of electronic and thermal Energies= -721.850165  
 Sum of electronic and thermal Enthalpies= -721.849221  
 Sum of electronic and thermal Free Energies= -721.908120

### Reaction step B1''

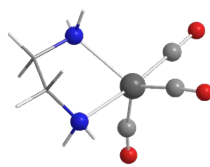

**ImA<sub>1</sub>''**

|    |              |              |              |
|----|--------------|--------------|--------------|
| Re | 0.224533000  | 0.006393000  | 0.028052000  |
| O  | 2.722831000  | -0.212222000 | -1.721922000 |
| O  | 1.139057000  | -2.515907000 | 1.563485000  |
| N  | -1.802806000 | 0.159109000  | 1.146279000  |
| N  | -1.425748000 | -0.236076000 | -1.606263000 |
| C  | 1.764185000  | -0.127052000 | -1.043174000 |
| C  | 0.713357000  | 1.783634000  | 0.525496000  |
| C  | 0.706762000  | -1.602667000 | 0.937090000  |
| O  | 1.141963000  | 2.822359000  | 0.915794000  |
| C  | -2.912740000 | 0.396424000  | 0.208391000  |
| C  | -2.738857000 | -0.499786000 | -0.997278000 |
| H  | -1.774128000 | 0.899253000  | 1.835104000  |
| H  | -1.971972000 | -0.696062000 | 1.661500000  |
| H  | -1.185291000 | -0.983386000 | -2.243321000 |
| H  | -1.472868000 | 0.606916000  | -2.164547000 |
| H  | -2.867227000 | 1.442111000  | -0.101159000 |
| H  | -3.884570000 | 0.220882000  | 0.674472000  |
| H  | -2.755072000 | -1.545286000 | -0.683580000 |
| H  | -3.556024000 | -0.342310000 | -1.704471000 |

Sum of electronic and zero-point Energies= -608.990349  
 Sum of electronic and thermal Energies= -608.977868  
 Sum of electronic and thermal Enthalpies= -608.976924  
 Sum of electronic and thermal Free Energies= -609.031379

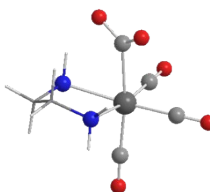

**ImB<sub>1</sub>''**

|    |              |              |              |
|----|--------------|--------------|--------------|
| Re | -0.283645000 | -0.067616000 | -0.001865000 |
| O  | -2.143278000 | 0.862189000  | 2.243709000  |
| O  | -1.787153000 | -2.784363000 | -0.176320000 |
| N  | 1.352405000  | -0.593937000 | -1.490494000 |



|   |              |              |              |
|---|--------------|--------------|--------------|
| N | 1.396697000  | -0.813569000 | 1.288528000  |
| C | -1.439363000 | 0.502914000  | 1.395007000  |
| C | -1.499501000 | 0.723162000  | -1.239752000 |
| C | -1.200594000 | -1.789020000 | -0.124192000 |
| O | -2.238242000 | 1.212925000  | -1.985660000 |
| C | 2.638756000  | -0.828547000 | -0.799627000 |
| C | 2.392113000  | -1.559289000 | 0.503466000  |
| C | 1.018064000  | 1.760040000  | 0.139758000  |
| O | 1.103378000  | 2.556612000  | -0.835332000 |
| O | 1.738301000  | 1.899670000  | 1.185891000  |
| H | 1.447237000  | 0.202389000  | -2.110927000 |
| H | 1.115258000  | -1.392713000 | -2.065786000 |
| H | 1.121219000  | -1.346811000 | 2.102265000  |
| H | 1.768198000  | 0.102626000  | 1.591029000  |
| H | 3.079416000  | 0.146031000  | -0.592490000 |
| H | 3.328744000  | -1.391932000 | -1.428603000 |
| H | 1.995729000  | -2.556907000 | 0.305271000  |
| H | 3.332963000  | -1.670738000 | 1.046641000  |

Sum of electronic and zero-point Energies= -797.642158  
Sum of electronic and thermal Energies= -797.626943  
Sum of electronic and thermal Enthalpies= -797.625999  
Sum of electronic and thermal Free Energies= -797.686314

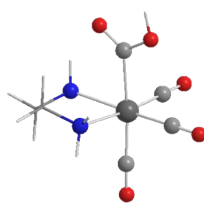

**ImC<sub>1</sub>**

|    |              |              |              |
|----|--------------|--------------|--------------|
| Re | -0.241495000 | -0.115202000 | 0.003449000  |
| O  | -2.201033000 | 0.544905000  | 2.261648000  |
| O  | -1.360050000 | -3.011817000 | -0.059565000 |
| N  | 1.406476000  | -0.550112000 | -1.508035000 |
| N  | 1.546727000  | -0.602271000 | 1.278598000  |
| C  | -1.461992000 | 0.294362000  | 1.411894000  |
| C  | -1.582550000 | 0.417762000  | -1.251295000 |
| C  | -0.918538000 | -1.950458000 | -0.045361000 |
| O  | -2.391802000 | 0.739057000  | -2.007575000 |
| C  | 2.727343000  | -0.607738000 | -0.842795000 |
| C  | 2.584015000  | -1.299455000 | 0.494673000  |
| C  | 0.672545000  | 1.896131000  | 0.145445000  |
| O  | 0.130105000  | 2.898423000  | -0.596748000 |
| O  | 1.630276000  | 2.196286000  | 0.852001000  |
| H  | 1.429107000  | 0.149728000  | -2.240361000 |
| H  | 1.225780000  | -1.429895000 | -1.977637000 |
| H  | 1.335493000  | -1.127156000 | 2.117720000  |
| H  | 1.892589000  | 0.316836000  | 1.562740000  |
| H  | 3.066108000  | 0.416694000  | -0.691439000 |
| H  | 3.459352000  | -1.123341000 | -1.464199000 |
| H  | 2.267803000  | -2.334231000 | 0.355838000  |
| H  | 3.541524000  | -1.303741000 | 1.017301000  |
| H  | 0.637027000  | 3.703507000  | -0.406020000 |

Sum of electronic and zero-point Energies= -798.122886  
Sum of electronic and thermal Energies= -798.107366  
Sum of electronic and thermal Enthalpies= -798.106422  
Sum of electronic and thermal Free Energies= -798.167368

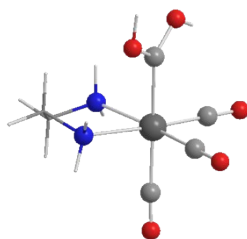

**ImD<sub>1</sub>**

|    |              |              |              |
|----|--------------|--------------|--------------|
| Re | 0.221711000  | 0.109323000  | -0.008291000 |
| O  | 2.496044000  | -0.293656000 | 2.007857000  |
| O  | 1.257568000  | 3.027997000  | -0.361523000 |
| N  | -1.609042000 | 0.440155000  | -1.300258000 |
| N  | -1.371124000 | 0.745189000  | 1.475631000  |
| C  | 1.641338000  | -0.150582000 | 1.251657000  |
| C  | 1.413722000  | -0.427659000 | -1.420308000 |
| C  | 0.846906000  | 1.972585000  | -0.223646000 |
| O  | 2.122942000  | -0.745811000 | -2.263656000 |
| C  | -2.827780000 | 0.574545000  | -0.469323000 |
| C  | -2.503552000 | 1.383155000  | 0.764942000  |
| C  | -0.487898000 | -1.925102000 | 0.130889000  |
| O  | -1.229571000 | -2.431499000 | -0.808472000 |
| O  | -0.246885000 | -2.809939000 | 1.056189000  |
| H  | -1.736930000 | -0.322459000 | -1.957068000 |
| H  | -1.494976000 | 1.272383000  | -1.868158000 |
| H  | -0.997909000 | 1.392069000  | 2.160884000  |
| H  | -1.717256000 | -0.040722000 | 2.016008000  |
| H  | -3.152271000 | -0.427827000 | -0.188673000 |
| H  | -3.634963000 | 1.043433000  | -1.030948000 |
| H  | -2.197608000 | 2.392023000  | 0.487323000  |
| H  | -3.378108000 | 1.458955000  | 1.410376000  |
| H  | -1.455683000 | -3.362086000 | -0.642505000 |
| H  | 0.301332000  | -2.440825000 | 1.758521000  |

Sum of electronic and zero-point Energies= -798.540894  
 Sum of electronic and thermal Energies= -798.525249  
 Sum of electronic and thermal Enthalpies= -798.524305  
 Sum of electronic and thermal Free Energies= -798.584925

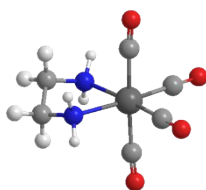

**ImE<sub>1</sub>**

|    |              |              |              |
|----|--------------|--------------|--------------|
| Re | 0.167806000  | -0.000005000 | 0.000000000  |
| C  | 1.539626000  | -0.075982000 | 1.369632000  |
| C  | 1.539673000  | 0.075859000  | -1.369590000 |
| O  | 2.341395000  | -0.118167000 | 2.180534000  |
| O  | 2.341510000  | 0.117980000  | -2.180430000 |
| C  | 0.221752000  | -2.011796000 | -0.115574000 |
| O  | 0.316931000  | -3.137347000 | -0.183255000 |
| C  | 0.221921000  | 2.011774000  | 0.115509000  |
| O  | 0.317328000  | 3.137308000  | 0.183160000  |
| N  | -1.607746000 | -0.083421000 | 1.398590000  |
| N  | -1.607746000 | 0.083547000  | -1.398590000 |
| C  | -2.847090000 | -0.391775000 | 0.645526000  |
| C  | -2.847059000 | 0.392010000  | -0.645519000 |

|   |              |              |              |
|---|--------------|--------------|--------------|
| H | -1.726358000 | 0.798820000  | 1.885779000  |
| H | -1.480623000 | -0.772388000 | 2.131921000  |
| H | -1.726432000 | -0.798691000 | -1.885767000 |
| H | -1.480586000 | 0.772495000  | -2.131933000 |
| H | -3.731179000 | -0.154430000 | 1.236190000  |
| H | -2.855508000 | -1.462423000 | 0.439361000  |
| H | -3.731171000 | 0.154747000  | -1.236182000 |
| H | -2.855374000 | 1.462658000  | -0.439351000 |

Sum of electronic and zero-point Energies= -722.132684  
Sum of electronic and thermal Energies= -722.118461  
Sum of electronic and thermal Enthalpies= -722.117517  
Sum of electronic and thermal Free Energies= -722.174977

### Reaction step A2

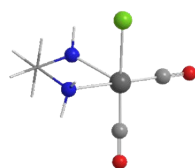

ImA<sub>2</sub>

|    |              |              |              |
|----|--------------|--------------|--------------|
| Re | 0.332364000  | -0.030136000 | -0.167910000 |
| Cl | -0.831092000 | -2.325647000 | -0.386872000 |
| O  | 3.000458000  | -0.995445000 | 0.935816000  |
| O  | 1.670709000  | 2.675225000  | -0.494420000 |
| N  | -1.685343000 | 0.663686000  | -1.081291000 |
| N  | -1.096843000 | 0.250316000  | 1.635628000  |
| C  | 1.957207000  | -0.634354000 | 0.506231000  |
| C  | 1.140375000  | 1.620732000  | -0.361164000 |
| C  | -2.770574000 | 0.633181000  | -0.082294000 |
| C  | -2.240691000 | 1.095158000  | 1.258426000  |
| H  | -1.928108000 | 0.066769000  | -1.863116000 |
| H  | -1.585548000 | 1.599926000  | -1.454186000 |
| H  | -0.619759000 | 0.642252000  | 2.435817000  |
| H  | -1.425288000 | -0.670857000 | 1.908852000  |
| H  | -3.110326000 | -0.399804000 | -0.001014000 |
| H  | -3.618965000 | 1.248342000  | -0.386946000 |
| H  | -1.884736000 | 2.124047000  | 1.187345000  |
| H  | -3.037972000 | 1.060964000  | 2.004590000  |

Sum of electronic and zero-point Energies= -955.914303  
Sum of electronic and thermal Energies= -955.902111  
Sum of electronic and thermal Enthalpies= -955.901167  
Sum of electronic and thermal Free Energies= -955.955586

### Reaction step B2'

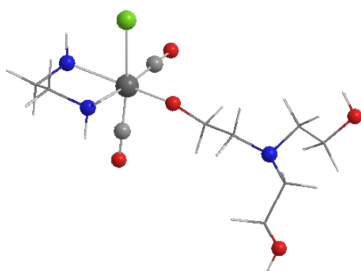

**ImB<sub>2</sub>'**

|    |              |              |              |
|----|--------------|--------------|--------------|
| Re | 1.621656000  | -0.178439000 | -0.141466000 |
| O  | 1.088515000  | 0.580606000  | -3.019059000 |
| N  | 3.839216000  | -0.133268000 | -0.383457000 |
| N  | 2.200348000  | 1.935205000  | 0.558032000  |
| C  | 1.284848000  | 0.296284000  | -1.887866000 |
| C  | 1.347623000  | -1.936807000 | -0.675092000 |
| Cl | 2.348567000  | -0.761970000 | 2.330848000  |
| O  | 1.207197000  | -3.048599000 | -1.045464000 |
| C  | 4.328731000  | 1.258769000  | -0.424928000 |
| C  | 3.664239000  | 2.049969000  | 0.683610000  |
| N  | -3.869680000 | 0.163393000  | 0.299530000  |
| C  | -5.075677000 | -1.858293000 | -0.420401000 |
| C  | -4.282365000 | -1.175594000 | 0.685027000  |
| O  | -5.570857000 | -3.125805000 | -0.025232000 |
| C  | -4.842337000 | 2.266447000  | -0.508431000 |
| C  | -4.907827000 | 1.155465000  | 0.522380000  |
| O  | -5.816636000 | 3.239616000  | -0.169364000 |
| C  | -1.402696000 | 0.010543000  | 0.065504000  |
| C  | -2.583071000 | 0.543741000  | 0.871756000  |
| O  | -0.213924000 | 0.303813000  | 0.694711000  |
| H  | 4.160198000  | -0.633248000 | -1.201804000 |
| H  | 4.233520000  | -0.606098000 | 0.425334000  |
| H  | 1.750543000  | 2.119842000  | 1.447029000  |
| H  | 1.846043000  | 2.622351000  | -0.096077000 |
| H  | 5.414581000  | 1.304568000  | -0.319460000 |
| H  | 4.061353000  | 1.674064000  | -1.397424000 |
| H  | 3.943348000  | 1.626581000  | 1.648457000  |
| H  | 3.996314000  | 3.088890000  | 0.656991000  |
| H  | -4.446717000 | -1.938523000 | -1.313934000 |
| H  | -5.950657000 | -1.262274000 | -0.685833000 |
| H  | -4.876961000 | -1.172273000 | 1.612378000  |
| H  | -3.389854000 | -1.772968000 | 0.884183000  |
| H  | -4.823388000 | -3.704572000 | 0.139362000  |
| H  | -5.035063000 | 1.843737000  | -1.500574000 |
| H  | -3.840358000 | 2.710137000  | -0.521777000 |
| H  | -4.846612000 | 1.590616000  | 1.532414000  |
| H  | -5.886810000 | 0.678342000  | 0.445137000  |
| H  | -5.788065000 | 3.939801000  | -0.823020000 |
| H  | -1.464698000 | 0.451699000  | -0.946448000 |
| H  | -1.530524000 | -1.078614000 | -0.081068000 |
| H  | -2.495113000 | 0.203362000  | 1.916307000  |
| H  | -2.513285000 | 1.633501000  | 0.892559000  |

Sum of electronic and zero-point Energies= -1473.281258  
Sum of electronic and thermal Energies= -1473.255786  
Sum of electronic and thermal Enthalpies= -1473.254842  
Sum of electronic and thermal Free Energies= -1473.341829

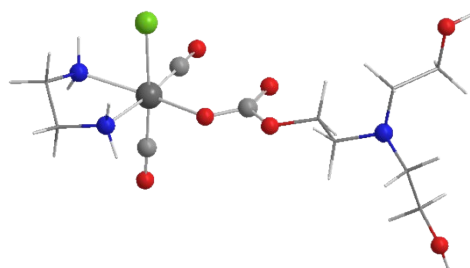**ImC<sub>2</sub>'**

|    |              |              |              |
|----|--------------|--------------|--------------|
| Re | 2.516370000  | 0.051868000  | -0.208083000 |
| N  | 4.658783000  | -0.358290000 | 0.161954000  |
| N  | 2.803694000  | 0.802063000  | 1.927880000  |
| C  | 4.242839000  | 1.023896000  | 2.149402000  |
| C  | 5.008509000  | -0.155629000 | 1.588015000  |
| C  | 2.824107000  | 1.690736000  | -1.002235000 |
| O  | 3.041220000  | 2.723905000  | -1.525617000 |
| C  | 2.445353000  | -0.660149000 | -1.929592000 |
| O  | 2.449287000  | -1.092021000 | -3.020291000 |
| Cl | 2.220631000  | -2.215003000 | 1.026212000  |
| N  | -5.365971000 | 0.057060000  | 0.295414000  |
| C  | -2.972677000 | 0.004011000  | -0.215327000 |
| C  | -4.043773000 | 0.441554000  | 0.765699000  |
| O  | -1.716342000 | 0.337912000  | 0.351864000  |
| C  | -6.575752000 | -1.945376000 | -0.449020000 |
| C  | -5.703819000 | -1.319600000 | 0.622952000  |
| O  | -6.940537000 | -3.243596000 | -0.012979000 |
| C  | -6.469587000 | 2.174959000  | -0.275353000 |
| C  | -6.401618000 | 1.001743000  | 0.683919000  |
| O  | -7.434270000 | 3.088280000  | 0.218929000  |
| C  | -0.606302000 | 0.010250000  | -0.379710000 |
| O  | 0.444830000  | 0.365725000  | 0.235121000  |
| O  | -0.725089000 | -0.540612000 | -1.465352000 |
| H  | 5.240318000  | 0.231413000  | -0.419637000 |
| H  | 4.877153000  | -1.314277000 | -0.093788000 |
| H  | 2.461552000  | 0.078787000  | 2.554197000  |
| H  | 2.277263000  | 1.642274000  | 2.132627000  |
| H  | 4.479474000  | 1.147512000  | 3.207959000  |
| H  | 4.523580000  | 1.940448000  | 1.629366000  |
| H  | 6.081827000  | -0.009535000 | 1.711921000  |
| H  | 4.721357000  | -1.061349000 | 2.121817000  |
| H  | -3.112399000 | 0.516975000  | -1.169493000 |
| H  | -3.025230000 | -1.070992000 | -0.404228000 |
| H  | -3.829578000 | 0.026301000  | 1.761893000  |
| H  | -4.000092000 | 1.527421000  | 0.861798000  |
| H  | -6.011842000 | -1.986413000 | -1.387224000 |
| H  | -7.466444000 | -1.329461000 | -0.619687000 |
| H  | -6.210273000 | -1.393810000 | 1.597415000  |
| H  | -4.786501000 | -1.905327000 | 0.700412000  |
| H  | -7.467846000 | -3.658729000 | -0.697095000 |
| H  | -6.745772000 | 1.806805000  | -1.269475000 |
| H  | -5.487677000 | 2.655162000  | -0.356793000 |
| H  | -6.249906000 | 1.374185000  | 1.708611000  |
| H  | -7.368925000 | 0.496745000  | 0.672930000  |
| H  | -7.490539000 | 3.829897000  | -0.385507000 |

Sum of electronic and zero-point Energies= -1661.897252  
Sum of electronic and thermal Energies= -1661.869061  
Sum of electronic and thermal Enthalpies= -1661.868117  
Sum of electronic and thermal Free Energies= -1661.961464

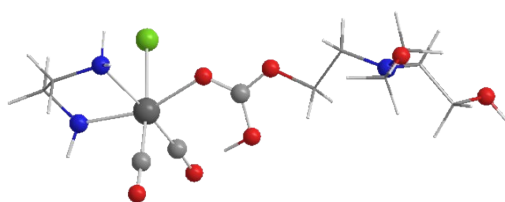

**ImD<sub>2</sub>'**

|    |             |             |             |
|----|-------------|-------------|-------------|
| Re | 2.466537000 | 0.122746000 | 0.123418000 |
|----|-------------|-------------|-------------|

|    |              |              |              |
|----|--------------|--------------|--------------|
| N  | 4.651364000  | 0.130877000  | 0.264079000  |
| N  | 3.000711000  | -1.855453000 | -0.838798000 |
| C  | 4.375012000  | -2.207560000 | -0.430976000 |
| C  | 5.243209000  | -0.972884000 | -0.533661000 |
| C  | 2.266593000  | -0.618493000 | 1.820299000  |
| O  | 2.176442000  | -1.079763000 | 2.892017000  |
| C  | 2.287806000  | 1.837206000  | 0.867153000  |
| O  | 2.248991000  | 2.903979000  | 1.340118000  |
| Cl | 2.875302000  | 0.976520000  | -2.242791000 |
| N  | -5.381008000 | -0.118463000 | -0.305370000 |
| C  | -2.984104000 | 0.008728000  | 0.028728000  |
| C  | -4.096768000 | -0.499198000 | -0.865030000 |
| O  | -1.737068000 | -0.323581000 | -0.622350000 |
| C  | -6.576172000 | 1.897448000  | 0.424530000  |
| C  | -5.798530000 | 1.221752000  | -0.689099000 |
| O  | -7.015271000 | 3.156259000  | -0.053926000 |
| C  | -6.337740000 | -2.211152000 | 0.549566000  |
| C  | -6.413647000 | -1.123845000 | -0.505673000 |
| O  | -7.311388000 | -3.190782000 | 0.235689000  |
| C  | -0.610026000 | 0.007620000  | -0.063664000 |
| O  | 0.447338000  | -0.277672000 | -0.618859000 |
| O  | -0.685454000 | 0.636550000  | 1.079843000  |
| H  | 4.956270000  | 0.055746000  | 1.226866000  |
| H  | 5.019447000  | 1.011313000  | -0.078962000 |
| H  | 2.960705000  | -1.731384000 | -1.846973000 |
| H  | 2.364374000  | -2.610386000 | -0.611694000 |
| H  | 4.787863000  | -3.004103000 | -1.051372000 |
| H  | 4.337201000  | -2.562811000 | 0.598988000  |
| H  | 6.258528000  | -1.187707000 | -0.201776000 |
| H  | 5.282780000  | -0.637342000 | -1.569503000 |
| H  | -3.021888000 | -0.476309000 | 1.003214000  |
| H  | -3.034516000 | 1.089150000  | 0.162381000  |
| H  | -3.958911000 | -0.119022000 | -1.886762000 |
| H  | -4.029956000 | -1.586205000 | -0.917568000 |
| H  | -5.923335000 | 2.009873000  | 1.297067000  |
| H  | -7.428703000 | 1.275700000  | 0.721387000  |
| H  | -6.403957000 | 1.211471000  | -1.607380000 |
| H  | -4.915179000 | 1.826252000  | -0.902737000 |
| H  | -7.496871000 | 3.598890000  | 0.646523000  |
| H  | -6.524246000 | -1.766163000 | 1.533059000  |
| H  | -5.334593000 | -2.653230000 | 0.566839000  |
| H  | -6.352825000 | -1.577184000 | -1.506159000 |
| H  | -7.392021000 | -0.646551000 | -0.435046000 |
| H  | -7.280271000 | -3.877837000 | 0.903104000  |
| H  | 0.239711000  | 0.814652000  | 1.354946000  |

Sum of electronic and zero-point Energies= -1662.336507  
Sum of electronic and thermal Energies= -1662.308254  
Sum of electronic and thermal Enthalpies= -1662.307310  
Sum of electronic and thermal Free Energies= -1662.401090

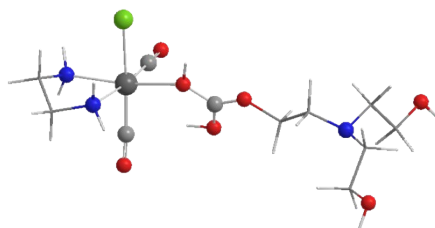

**ImE<sub>2</sub>'**

S22

|    |              |              |              |
|----|--------------|--------------|--------------|
| Re | 2.529492000  | 0.171755000  | 0.070353000  |
| N  | 4.675939000  | 0.213926000  | 0.285375000  |
| N  | 3.041867000  | -2.009830000 | -0.253068000 |
| C  | 4.417389000  | -2.225854000 | 0.245397000  |
| C  | 5.279716000  | -1.061478000 | -0.186444000 |
| C  | 2.339628000  | -0.068155000 | 1.921191000  |
| O  | 2.286727000  | -0.221578000 | 3.075402000  |
| C  | 2.314943000  | 2.034972000  | 0.284931000  |
| O  | 2.225281000  | 3.181277000  | 0.428912000  |
| Cl | 2.816406000  | 0.249084000  | -2.418528000 |
| N  | -5.459252000 | -0.118186000 | -0.292185000 |
| C  | -3.090216000 | 0.002261000  | 0.040117000  |
| C  | -4.186470000 | -0.464233000 | -0.892436000 |
| O  | -1.805819000 | -0.232230000 | -0.660141000 |
| C  | -6.671838000 | 1.858833000  | 0.515648000  |
| C  | -5.915524000 | 1.221053000  | -0.634543000 |
| O  | -7.142617000 | 3.119144000  | 0.074862000  |
| C  | -6.341479000 | -2.230041000 | 0.596069000  |
| C  | -6.477541000 | -1.145602000 | -0.455950000 |
| O  | -7.310543000 | -3.224509000 | 0.321137000  |
| C  | -0.720265000 | -0.032304000 | -0.062277000 |
| O  | 0.395690000  | -0.234317000 | -0.704070000 |
| O  | -0.638668000 | 0.355072000  | 1.139656000  |
| H  | 4.955388000  | 0.385990000  | 1.244429000  |
| H  | 5.067203000  | 0.978359000  | -0.255004000 |
| H  | 3.007561000  | -2.206648000 | -1.250036000 |
| H  | 2.409486000  | -2.665112000 | 0.191628000  |
| H  | 4.836535000  | -3.158515000 | -0.132553000 |
| H  | 4.374766000  | -2.287944000 | 1.332773000  |
| H  | 6.293295000  | -1.166399000 | 0.197542000  |
| H  | 5.324483000  | -1.015386000 | -1.274071000 |
| H  | -3.071540000 | -0.570238000 | 0.964039000  |
| H  | -3.140316000 | 1.068745000  | 0.249591000  |
| H  | -4.051941000 | -0.018238000 | -1.885963000 |
| H  | -4.111889000 | -1.545277000 | -1.009130000 |
| H  | -5.996577000 | 1.963479000  | 1.371990000  |
| H  | -7.505850000 | 1.217392000  | 0.822375000  |
| H  | -6.547507000 | 1.215777000  | -1.534061000 |
| H  | -5.050996000 | 1.847686000  | -0.861776000 |
| H  | -7.623147000 | 3.534906000  | 0.792322000  |
| H  | -6.494750000 | -1.786521000 | 1.585868000  |
| H  | -5.331204000 | -2.655921000 | 0.572558000  |
| H  | -6.443120000 | -1.596746000 | -1.457842000 |
| H  | -7.461059000 | -0.686577000 | -0.350269000 |
| H  | -7.249637000 | -3.905714000 | 0.992561000  |
| H  | 0.311526000  | -0.407018000 | -1.661170000 |
| H  | 0.328168000  | 0.462893000  | 1.375550000  |

Sum of electronic and zero-point Energies= -1662.710293  
Sum of electronic and thermal Energies= -1662.681620  
Sum of electronic and thermal Enthalpies= -1662.680675  
Sum of electronic and thermal Free Energies= -1662.775883

### Reaction step B2''

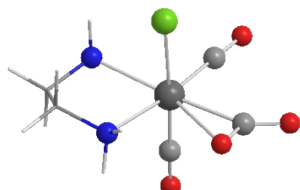

**ImB<sub>2</sub>**

|    |              |              |              |
|----|--------------|--------------|--------------|
| Re | 0.112895000  | 0.084819000  | 0.065703000  |
| O  | 0.774773000  | 2.951637000  | -0.660441000 |
| N  | -1.786004000 | 0.503923000  | 1.273603000  |
| N  | -1.587993000 | -0.083370000 | -1.458078000 |
| C  | 0.509767000  | 1.846408000  | -0.379452000 |
| C  | 1.350030000  | 0.231732000  | 1.487229000  |
| Cl | -0.559674000 | -2.346677000 | 0.572313000  |
| O  | 2.117877000  | 0.343249000  | 2.348408000  |
| C  | -2.890743000 | 0.874249000  | 0.370161000  |
| C  | -2.908101000 | -0.085785000 | -0.801072000 |
| C  | 1.861110000  | -0.553874000 | -1.049604000 |
| O  | 1.176343000  | -0.942686000 | -2.033597000 |
| O  | 3.074193000  | -0.565998000 | -0.870583000 |
| H  | -1.657347000 | 1.220497000  | 1.976123000  |
| H  | -2.016595000 | -0.355259000 | 1.764425000  |
| H  | -1.445781000 | -0.942767000 | -1.975675000 |
| H  | -1.532204000 | 0.669737000  | -2.133142000 |
| H  | -3.854092000 | 0.856500000  | 0.883419000  |
| H  | -2.708773000 | 1.891871000  | 0.021980000  |
| H  | -3.092772000 | -1.097418000 | -0.439868000 |
| H  | -3.705007000 | 0.179025000  | -1.496833000 |

Sum of electronic and zero-point Energies= -1144.533635  
 Sum of electronic and thermal Energies= -1144.518334  
 Sum of electronic and thermal Enthalpies= -1144.517390  
 Sum of electronic and thermal Free Energies= -1144.578755

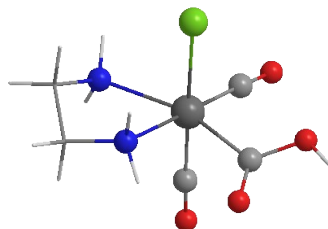

**ImC<sub>2</sub>**

|    |              |              |              |
|----|--------------|--------------|--------------|
| Re | 0.082928000  | 0.041652000  | 0.162451000  |
| O  | 0.903784000  | 2.954237000  | -0.324950000 |
| N  | -1.886318000 | 0.612492000  | 1.128703000  |
| N  | -1.414064000 | -0.209429000 | -1.473104000 |
| C  | 0.562974000  | 1.868253000  | -0.166160000 |
| C  | 1.351469000  | 0.270105000  | 1.595532000  |
| Cl | -0.484642000 | -2.293135000 | 0.672932000  |
| O  | 2.118510000  | 0.452085000  | 2.429677000  |
| C  | -3.031331000 | 0.237807000  | 0.266716000  |
| C  | -2.667881000 | 0.508698000  | -1.176777000 |
| C  | 1.469829000  | -0.424091000 | -1.375713000 |
| O  | 2.610936000  | -1.041172000 | -0.978952000 |
| O  | 1.303871000  | -0.219277000 | -2.566351000 |
| H  | -1.923292000 | 1.602932000  | 1.340783000  |
| H  | -1.963190000 | 0.137272000  | 2.022454000  |
| H  | -1.601814000 | -1.204035000 | -1.568580000 |



|   |              |              |              |
|---|--------------|--------------|--------------|
| H | -1.004321000 | 0.092840000  | -2.352219000 |
| H | -3.214189000 | -0.827258000 | 0.407996000  |
| H | -3.930778000 | 0.782641000  | 0.550878000  |
| H | -3.474453000 | 0.194028000  | -1.838914000 |
| H | -2.493008000 | 1.573510000  | -1.333698000 |
| H | 3.119847000  | -1.245606000 | -1.778556000 |

Sum of electronic and zero-point Energies= -1144.999286  
Sum of electronic and thermal Energies= -1144.983754  
Sum of electronic and thermal Enthalpies= -1144.982810  
Sum of electronic and thermal Free Energies= -1145.044486

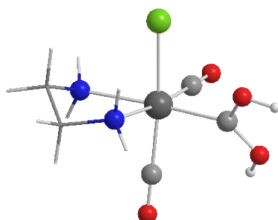

**ImD<sub>2</sub>''**

|    |              |              |              |
|----|--------------|--------------|--------------|
| Re | 0.058038000  | 0.050952000  | 0.126706000  |
| O  | 0.376613000  | 3.129018000  | -0.242760000 |
| N  | -1.942908000 | 0.410890000  | 1.076756000  |
| N  | -1.356399000 | -0.127900000 | -1.607455000 |
| C  | 0.264713000  | 2.004765000  | -0.118688000 |
| C  | 1.127906000  | 0.075343000  | 1.724518000  |
| Cl | -0.403409000 | -2.283416000 | 0.402514000  |
| O  | 1.758287000  | 0.073039000  | 2.678755000  |
| C  | -3.035870000 | 0.018077000  | 0.151411000  |
| C  | -2.678631000 | 0.439451000  | -1.255214000 |
| C  | 1.787006000  | -0.295939000 | -0.999775000 |
| O  | 1.908467000  | -1.392839000 | -1.680802000 |
| O  | 2.829499000  | 0.474104000  | -1.165898000 |
| H  | -2.065741000 | 1.379396000  | 1.355771000  |
| H  | -2.021561000 | -0.124655000 | 1.935274000  |
| H  | -1.458189000 | -1.119033000 | -1.812822000 |
| H  | -1.021147000 | 0.301770000  | -2.462330000 |
| H  | -3.133468000 | -1.065534000 | 0.204722000  |
| H  | -3.980375000 | 0.464968000  | 0.457365000  |
| H  | -3.445409000 | 0.107141000  | -1.954199000 |
| H  | -2.606033000 | 1.525069000  | -1.322577000 |
| H  | 2.762758000  | -1.436220000 | -2.141551000 |
| H  | 2.795747000  | 1.266108000  | -0.618349000 |

Sum of electronic and zero-point Energies= -1145.409429  
Sum of electronic and thermal Energies= -1145.393972  
Sum of electronic and thermal Enthalpies= -1145.393028  
Sum of electronic and thermal Free Energies= -1145.454240

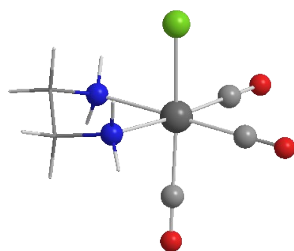

**ImE<sub>2</sub>''**

|    |             |             |             |
|----|-------------|-------------|-------------|
| Re | 0.170667000 | 0.017992000 | 0.010786000 |
|----|-------------|-------------|-------------|

S25

|    |              |              |              |
|----|--------------|--------------|--------------|
| C  | 0.355410000  | 2.007234000  | 0.136258000  |
| O  | 0.481945000  | 3.128967000  | 0.199347000  |
| C  | 1.597240000  | -0.262575000 | 1.329173000  |
| O  | 2.434047000  | -0.429316000 | 2.077341000  |
| C  | 1.660175000  | 0.016518000  | -1.292643000 |
| O  | 2.531464000  | 0.015633000  | -2.016143000 |
| N  | -1.568203000 | 0.013020000  | 1.401245000  |
| N  | -1.565959000 | 0.242846000  | -1.372355000 |
| C  | -2.790137000 | 0.614565000  | -0.622497000 |
| C  | -2.837659000 | -0.187578000 | 0.655468000  |
| Cl | -0.182159000 | -2.315206000 | -0.263509000 |
| H  | -1.627052000 | 0.872626000  | 1.939441000  |
| H  | -1.468783000 | -0.724734000 | 2.092010000  |
| H  | -1.709474000 | -0.655741000 | -1.827231000 |
| H  | -1.416481000 | 0.907080000  | -2.124393000 |
| H  | -3.680931000 | 0.431513000  | -1.221543000 |
| H  | -2.739568000 | 1.681251000  | -0.405716000 |
| H  | -3.690896000 | 0.105165000  | 1.264486000  |
| H  | -2.920795000 | -1.250398000 | 0.432537000  |

Sum of electronic and zero-point Energies= -1069.005204  
 Sum of electronic and thermal Energies= -1068.991075  
 Sum of electronic and thermal Enthalpies= -1068.990131  
 Sum of electronic and thermal Free Energies= -1069.048911
